## Addition of 2-(ethylamino)acetonitrile group to nitroxoline results in significantly improved anti-tumor activity *in vitro* and *in vivo*

Ana Mitrović<sup>1</sup>, Izidor Sosič<sup>1</sup>, Špela Kos<sup>2</sup>, Urša Lampreht Tratar<sup>2</sup>, Barbara Breznik<sup>3,4</sup>, Simona Kranjc<sup>2</sup>, Bojana Mirković<sup>1</sup>, Stanislav Gobec<sup>1</sup>, Tamara Lah<sup>3</sup>, Maja Čemažar<sup>2</sup>, Gregor Serša<sup>2</sup> and Janko Kos<sup>1,5</sup>

<sup>1</sup>Faculty of Pharmacy, University of Ljubljana, 1000 Ljubljana, Slovenia

<sup>2</sup>Department of Experimental Oncology, Institute of Oncology Ljubljana, 1000 Ljubljana, Slovenia

<sup>3</sup>Department of Genetic Toxicology and Cancer Biology, National Institute of Biology, 1000 Ljubljana, Slovenia

<sup>4</sup>International Postgraduate School Jožef Stefan, 1000 Ljubljana, Slovenia

<sup>5</sup>Department of Biotechnology, Jožef Stefan Institute, 1000 Ljubljana, Slovenia

**Correspondence to:** Janko Kos, **email:** janko.kos@ffa.uni-lj.si

**Keywords:** nitroxoline derivative, cathepsin B, inhibition, tumor invasion, cell migration

**Received:** April 03, 2017

**Accepted:** June 10, 2017

**Published:** July 17, 2017

**Copyright:** Mitrović et al. This is an open-access article distributed under the terms of the Creative Commons Attribution License 3.0 (CC BY 3.0), which permits unrestricted use, distribution, and reproduction in any medium, provided the original author and source are credited.

### ABSTRACT

**Lysosomal cysteine peptidase cathepsin B, involved in multiple processes associated with tumor progression, is validated as a target for anti-cancer therapy. Nitroxoline, a known antimicrobial agent, is a potent and selective inhibitor of cathepsin B, hence reducing tumor progression *in vitro* and *in vivo*. In order to further improve its anti-cancer properties we developed a number of derivatives using structure-based chemical synthesis. Of these, the 7-aminomethylated derivative (compound 17) exhibited significantly improved kinetic properties over nitroxoline, inhibiting cathepsin B endopeptidase activity selectively. In the present study, we have evaluated its anti-cancer properties. It was more effective than nitroxoline in reducing tumor cell invasion and migration, as determined *in vitro* on two-dimensional cell models and tumor spheroids, under either endpoint or real time conditions. Moreover, it exhibited improved action over nitroxoline in impairing tumor growth *in vivo* in LPB mouse fibrosarcoma tumors in C57Bl/6 mice. Taken together, the addition of a 2-(ethylamino)acetonitrile group to nitroxoline at position 7 significantly improves its pharmacological characteristics and its potential for use as an anti-cancer drug.**

### INTRODUCTION

The proteolytic potential of lysosomal cysteine peptidases is highly relevant for cancer progression, initiating and assisting invasion related proteolytic cascades at the invasive edges of tumors. Of these, cathepsin B (EC 3.4.22.1) has been identified as an important tumor promoting factor [1–3], involved in extracellular matrix (ECM) degradation, a process enabling tumor migration, invasion, metastasis and

angiogenesis [1, 4]. Cathepsin B can modulate the ECM, either directly by proteolytic degradation of its components, such as laminin, fibronectin, collagen type I and IV and proteoglycans, or indirectly with the activation of other proteases downstream in a proteolytic cascade [5–9]. Additionally, cathepsin B enhances tumor progression by proteolytic degradation of the metalloprotease inhibitors, TIMP-1 and TIMP-2, and by release of growth factors VEGF and TGF- $\beta$ 1 bound to the ECM proteins [10–12].

Cathepsin B is unique among cysteine cathepsins because it acts as both an endopeptidase and an exopeptidase [13]. Its dual activity is due to the presence of an extra structural element termed the occluding loop [14]. This ~20 amino acid long occluding loop blocks binding of longer endopeptidase substrates, as it covers the S2' and S3' subsites of the active site cleft [15]. In the acidic milieu two salt bridges (Asp22-His110 and Asp224-Arg116) bind the loop to the body of the enzyme, limiting access of extended substrates to primed sites of the active site cleft, thereby favoring its dipeptidyl carboxypeptidase activity [14–17]. When the pH increases the salt bridges are disrupted and the resulting conformational change increases the enzyme's endopeptidase activity, with an optimum at neutral pH values [16, 18]. It has been proposed that the endopeptidase activity is involved predominantly in ECM degradation and tumor progression, although recent results suggest also the contribution of exopeptidase activity in tumor progression [19].

Cathepsin B has been validated as a promising target in the treatment of cancer, using a range of research tools, including cathepsin B-specific inhibitors, siRNAs and cathepsin B knock-down or overexpression mouse models [4, 20]. Several groups of cathepsin B inhibitors have been identified. The majority are covalent inhibitors that contain a peptidyl backbone with an electrophilic warhead that reacts with the active site cysteine residue, either reversibly or irreversibly [2, 21, 22]. However, due to their low bioavailability and off-target side effects, none of these compounds can be translated into clinical practice [2]. However, a number of non-covalent, reversible, small molecule inhibitors of cathepsin B have recently been reported [20, 23–27]. We identified nitroxoline (5-nitro-8-hydroxyquinoline), a well-established antimicrobial agent for the treatment of urinary tract infections, as a potent, reversible and selective non-covalent inhibitor of cathepsin B endopeptidase activity [27]. It was shown to reduce significantly ECM degradation, cell proliferation, tumor invasion and endothelial tube formation and induce cell cycle arrest *in vitro* in a number of cell lines. Moreover, it significantly abrogated tumor growth, angiogenesis and metastasis *in vivo* in various mouse models [20, 28–32]. In order to further improve the anti-cancer properties of nitroxoline we designed and synthesized a number of its derivatives [27, 33]. Among them, 2-[(8-hydroxy-5-nitroquinoline-7-yl)methyl]amino}-acetonitrile (compound 17) showed significantly improved kinetic properties for inhibition of cathepsin B endopeptidase activity [19, 33].

In the present study, we have further evaluated its effect on tumor growth, invasion and migration *in vitro* and *in vivo*. Compound 17 impairs tumor cell invasion and migration more effectively than nitroxoline, as monitored *in vitro* on two- and three-dimensional (2D and 3D) models, in both endpoint and real time conditions. Moreover, it also delayed the growth of LPB fibrosarcoma

tumors in C57Bl/6 mice more strongly than nitroxoline, thus designating compound 17 as a promising candidate for evaluation of its potential in anti-cancer therapy.

## RESULTS

### Compound 17 impairs tumor cell invasion

The ability of compound 17 to reduce tumor cell invasion was evaluated on the human glioma cell line U-87 MG and on the mouse fibrosarcoma cell line LPB-1. Invasion was monitored in real time using the xCELLigence system [34]. This system measures invasion of cells through Matrigel, a model of ECM, by monitoring the impedance, expressed as cell index (CI) (Figure 1A), across microelectrodes integrated in the membrane between top and bottom compartments of the CIM (cell invasion and migration)-plate 16. This was carried out over the entire course of the experiment. Compound 17 significantly reduced invasion of tumor cell lines, at 2.5  $\mu\text{M}$  concentration for U-87 MG cells by  $21 \pm 5\%$  and at 5  $\mu\text{M}$  concentration by  $61 \pm 3\%$  and  $74 \pm 4\%$  for U-87 MG and LPB-1 cells (Figure 1B). Furthermore, it shows improved inhibition of tumor invasion on U-87 MG cells compared to nitroxoline.

To exclude the possibility that the reduction of tumor cell invasion was due to compound 17-induced cytotoxicity, its effect on cell viability was evaluated by MTS cell viability assay. After treatment with compound 17 at concentrations up to 5  $\mu\text{M}$  for 24 or 72 h, the viability of neither cell line was reduced (Figure 2). On the other hand, nitroxoline did not affect cell viability of U-87 MG cells at concentrations up to only 2.5  $\mu\text{M}$  (Figure 2), however it did not affect cell viability of LPB-1 cells in concentration up to 5  $\mu\text{M}$  [20].

### Compound 17 reduces tumor cell invasion in a three-dimensional assay

Compound 17 was further evaluated for its ability to impair tumor cell invasion using a 3D *in vitro* tumor cell invasion model. This model is based on implantation of tumor spheroids into ECM-mimicking matrices and, as such, mimics early, avascular stages of tumor growth. It is therefore a more representative model of tumor cell invasion than are classic models involving cell monolayers. Spheroids from U-87 MG cells were prepared using the hanging drop method [35] following their implantation in Matrigel. Growth of spheroids was monitored for three days by measuring their dimensions under a light microscope with an ocular micrometer (Figure 3A). Representative images of U-87 MG spheroids were recorded on day three after implantation. U-87 MG spheroids displayed steady growth and formed invasive stands in a sunburst pattern around the original spheroid during the entire course of the experiment (Figure 3B).

Incubation of U-87 MG spheroids in the presence of compound 17 (2.5 and 5  $\mu\text{M}$ ) and of nitroxoline (2.5  $\mu\text{M}$ ) significantly reduced the growth of spheroids, the effect being more pronounced at the higher concentration of compound 17 ( $51 \pm 9\%$ ).

### Compound 17 inhibits cell migration in a three-dimensional assay

Compound 17 was evaluated for its ability to inhibit migration of two glioblastoma cell lines, U-87 MG and

U373 cells out of spheroids. Relative migration, calculated as the ratio between migration distance and spheroid diameter, was assessed on day three after the generation of spheroids. Compound 17 (2.5 and 5  $\mu\text{M}$ ) and nitroxoline (2.5  $\mu\text{M}$ ) both significantly decreased migration of cells out of U-87 MG spheroids, by  $24 \pm 3\%$  and  $61 \pm 6\%$  at 2.5 and 5  $\mu\text{M}$  concentrations of compound 17, and by  $52 \pm 8\%$  for nitroxoline (2.5  $\mu\text{M}$ ; Figure 4A and 4B). However, only compound 17 inhibited migration of cells out of U373 spheroids by  $14 \pm 3\%$  at both concentrations used (Figure 4C and 4D). Its effect on the migration of U-87

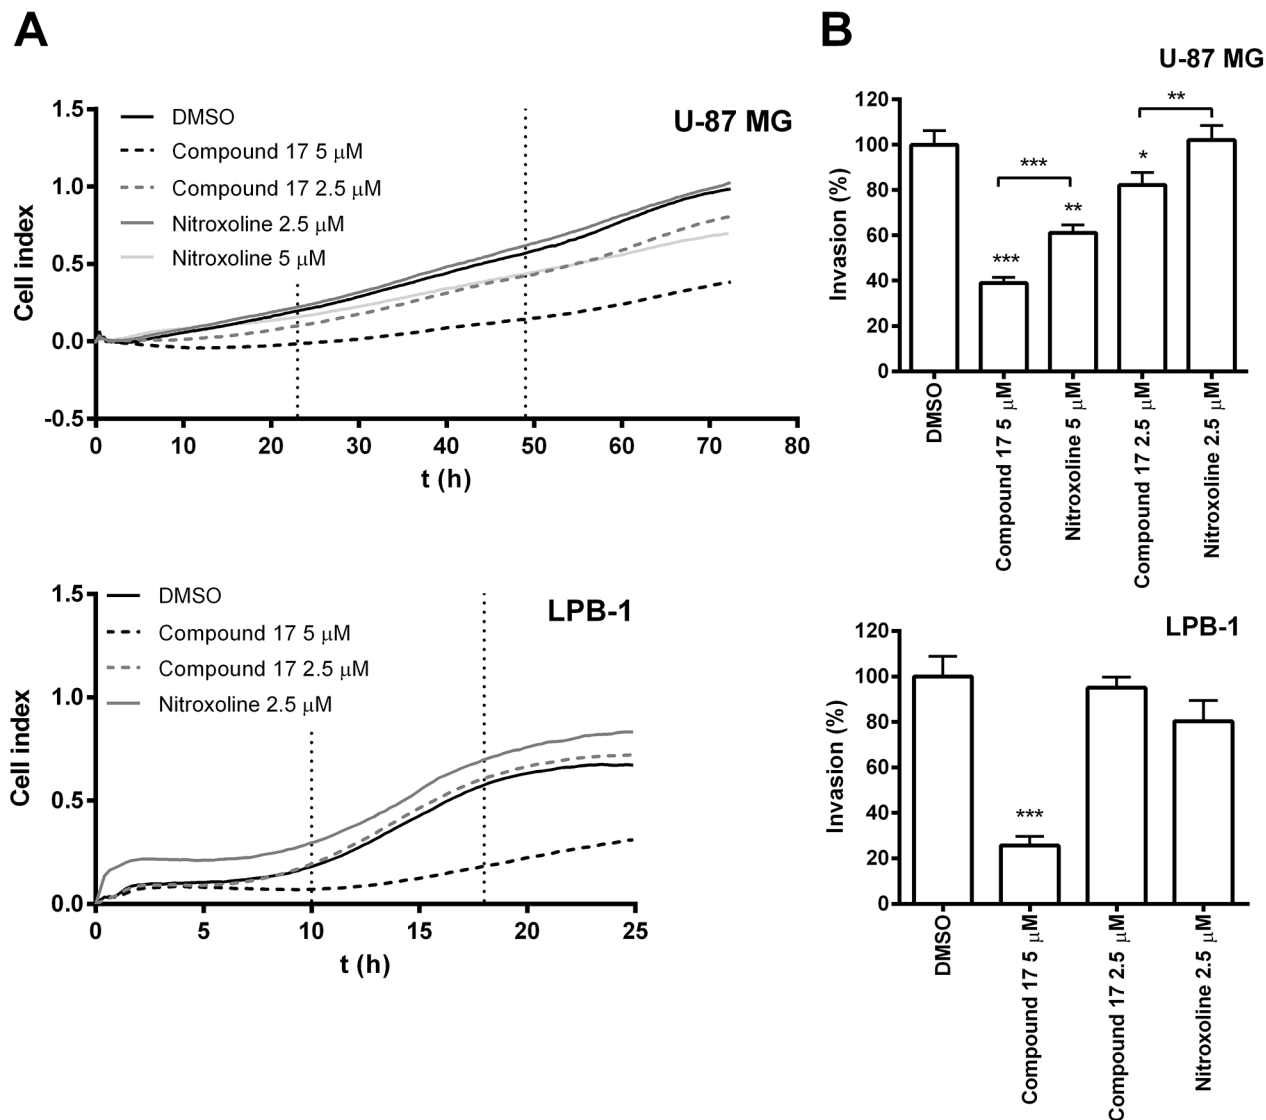

**Figure 1: Compound 17 impairs the invasion of tumor cells.** (A) Tumor cell invasion monitored in real time. Upper compartments of CIM-plate 16 were coated with Matrigel (2 mg/mL and 1 mg/ml for U-87 MG and LPB-1 cells, respectively). U-87 MG ( $7.5 \times 10^4$ ) or LPB-1 ( $5 \times 10^4$ ) cells were then seeded on top of it. The growth medium in the upper and lower compartments of the CIM-plate 16 was supplemented with compound 17 (2.5  $\mu\text{M}$  or 5  $\mu\text{M}$ ), nitroxoline (2.5  $\mu\text{M}$  or 5  $\mu\text{M}$ ) or DMSO (0.05%) as a control. Tumor cell invasion was then monitored continuously for 72 h by measuring impedance (reported as CI) using the xCELLigence system. (B) The ability of the cells to invade correlated to the slopes (1/h) in the time interval between 23 and 49 h for U-87 MG cells and between 10 and 18 h for LPB-1 cells and was used to calculate the percentage of invasion (%), presented as means  $\pm$  SEM. The experiments were performed in quadruplicate and repeated three times. \*  $P < 0.05$ , \*\*  $P < 0.01$ , \*\*\*  $P < 0.001$ .

MG or U373 cells and mesenchymal stem cells (MSCs) out of co-cultured spheroids was also monitored. Co-cultured spheroids constitute a more complex model that takes into account interactions of tumor cells with stromal cells derived from the tumor microenvironment. In U-87 MG/MSC co-cultured spheroids, the migration of U-87 MG cells decreased compared to U-87 MG monoculture spheroids, while the migration of MSCs increased (Figure 4B). Neither compound 17 (2.5 and 5  $\mu$ M) nor nitroxoline (2.5  $\mu$ M) had any effect on cell migration out of U-87 MG/MSC co-cultured spheroids (Figure 4A). Interactions between MSCs and U373 cells, on the other hand, increased migration out of U373/MSC co-cultured spheroids of both cell lines, U373 and MSCs, (Figure 4C). Interestingly, after treatment with compound 17 or nitroxoline a significant decrease in cell migration out of U373/MSC co-cultured spheroids was observed for both cell lines compared to that for control cells treated with DMSO. Compound 17 decreased migration of U373 cells

by  $42 \pm 4\%$  and  $42 \pm 5\%$  at 2.5 and 5  $\mu$ M concentrations respectively, and nitroxoline by  $33 \pm 3\%$ . Simultaneously, MSC cell migration was decreased by  $28 \pm 5\%$  and  $30 \pm 5\%$  at 2.5 and 5  $\mu$ M concentrations of compound 17, and by  $12 \pm 5\%$  for nitroxoline (2.5  $\mu$ M; Figure 4C).

Compound 17 did not induce cytotoxicity of U-87 MG, U373 cells or MSC in concentrations up to 5  $\mu$ M, as evaluated by MTS assay, while nitroxoline was not cytotoxic at concentrations up to only 2.5  $\mu$ M (Figure 2).

### Compound 17 delayed tumor growth *in vivo*

Administration of compound 17 *per os* delayed LPB fibrosarcoma tumor growth *in vivo* in C57Bl/6 mice. Compound 17 (20 mg/kg) and nitroxoline (20 mg/kg) were administered in drinking water for the entire duration of the experiment. Tumor volumes in mice receiving compound 17 or nitroxoline were both smaller in mice receiving drinking water only (Figure 5A). The

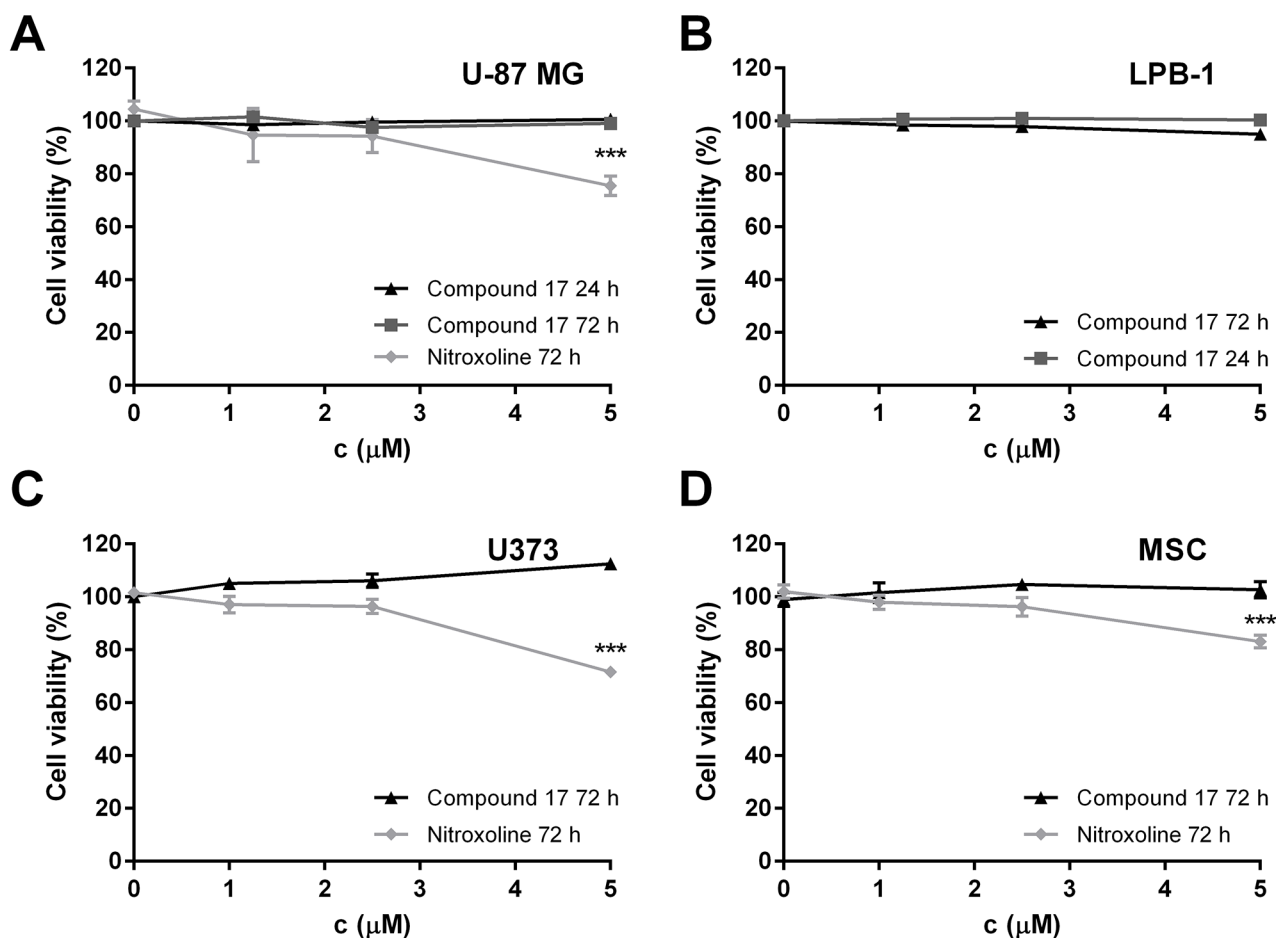

**Figure 2: The cytotoxicity of compound 17 on U-87 MG, U373 and LPB-1 cells and mesenchymal stem cells (MCS) as determined by MTS assay.** (A) U-87 MG cells ( $3 \times 10^4$  and  $5 \times 10^3$  for 24 and 72 h, respectively), (B) LPB-1 cells ( $1 \times 10^5$  and  $2.5 \times 10^3$  for 24 and 72 h, respectively), (C) U373 cells ( $3 \times 10^4$ ) and (D) MSCs ( $3 \times 10^4$ ) treated with increasing concentrations of compound 17 and nitroxoline for 24 or 72 h, following addition of MTS reagent. Results are presented as the percentage of viable cells from two independent experiments (mean  $\pm$  SEM) in the presence of the inhibitor compared to DMSO used as a control. The experiments were performed in quadruplicate. \*\*\* $P < 0.001$ .

time tumors needed to reach 40 mm<sup>3</sup> was significantly increased by compound 17, but only moderately by nitroxoline treatment (Figure 5B). Similar results were observed for delay of tumor growth, where compound 17 was more effective than nitroxoline (Figure 5B).

Neither compound 17 nor nitroxoline induced any systemic toxicity, as judged by monitoring body weight, behavior and appearance of the mice over the entire course of the experiment.

## DISCUSSION

Compound 17 is a product of focused chemical synthesis of nitroxoline derivatives that are based on the crystal structure of nitroxoline-cathepsin B complex [27, 33]. It is nitrile inhibitor that combines nitroxoline scaffold with nitrile fragment connected through amine spacer on position 7 (Figure 6) structure element described as suitable for cysteine cathepsin inhibitors [36]. Due to its potent but reversible inhibition of cathepsin B endopeptidase activity, together with the improved selectivity for cathepsin B with regard to related peptidases cathepsins H and L [33], compound 17 was chosen for

further evaluation of its anti-tumor activity *in vitro* and *in vivo*. Compound 17 was shown to reduce tumor cell migration and invasion and tumor growth significantly better than the parent compound nitroxoline.

Cathepsin B is an important tumor promoting enzyme. Its increased expression and activity are associated with various cancer types [37, 38]. Accordingly, to study the effect of compound 17 on tumor cell migration and invasion *in vitro*, we selected cell lines of different origins, all expressing high levels of cathepsin B [20, 39]. Compound 17 was effective in inhibiting tumor cell invasion of the human glioblastoma cells U-87 MG and mouse fibrosarcoma LPB-1 cells (Figure 1). The effect, observed by monitoring tumor invasion in real time on an xCELLigence system, was very pronounced and more reliable than using the end-point approach. Next, compound 17 was evaluated in a 3D invasion assay *in vitro* which, more accurately than the 2D model, reproduces the tumor microenvironment and captures the complexity of tumors [35]. In this assay, both compound 17 and nitroxoline reduced the growth of U-87 MG spheroids in Matrigel (Figure 3). The reason that the effect of both compounds is stronger in a 3D than in a 2D invasion

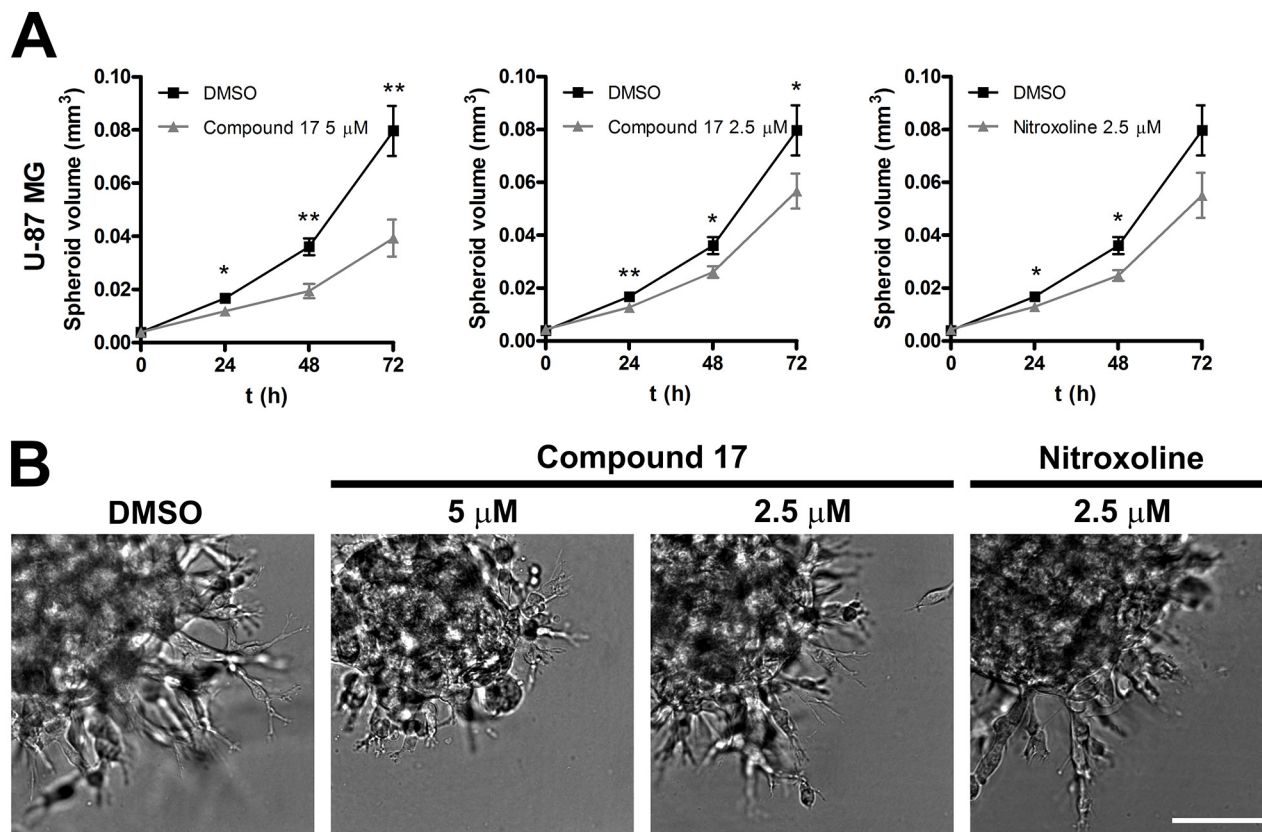

**Figure 3: Compound 17 impairs invasion of U-87 MG cells in a 3D *in vitro* model of tumor invasion.** (A) U-87 MG spheroids were implanted in Matrigel (5 mg/mL) and covered with growth medium. Compound 17 (2.5 μM or 5 μM), nitroxoline (2.5 μM) or DMSO (0.05%) as a control were added to the growth medium and to Matrigel. The spheroid volume was monitored for up to three days by measuring the spheroid dimensions. Data are presented as means ± SEM (n = 3). (B) Representative images of U-87 MG spheroids obtained at day three after implantation. Scale bar, 100 μm. \* *P* < 0.05, \*\* *P* < 0.01.

model is that the former is more complex and better resembles the *in vivo* situation. The function of cathepsin B is thus more significant, since it could also participate in the degradation of ECM in cell adhesion and signaling [40], these processes being important for cell organization within the spheroids. Taken together, the presented data

from independent models of tumor cell invasion show that compound 17, by inhibiting cathepsin B endopeptidase activity, acts as a potent inhibitor of tumor cell invasion *in vitro*.

Another process that is enhanced during tumor progression is cell migration [38]. Therefore, in addition

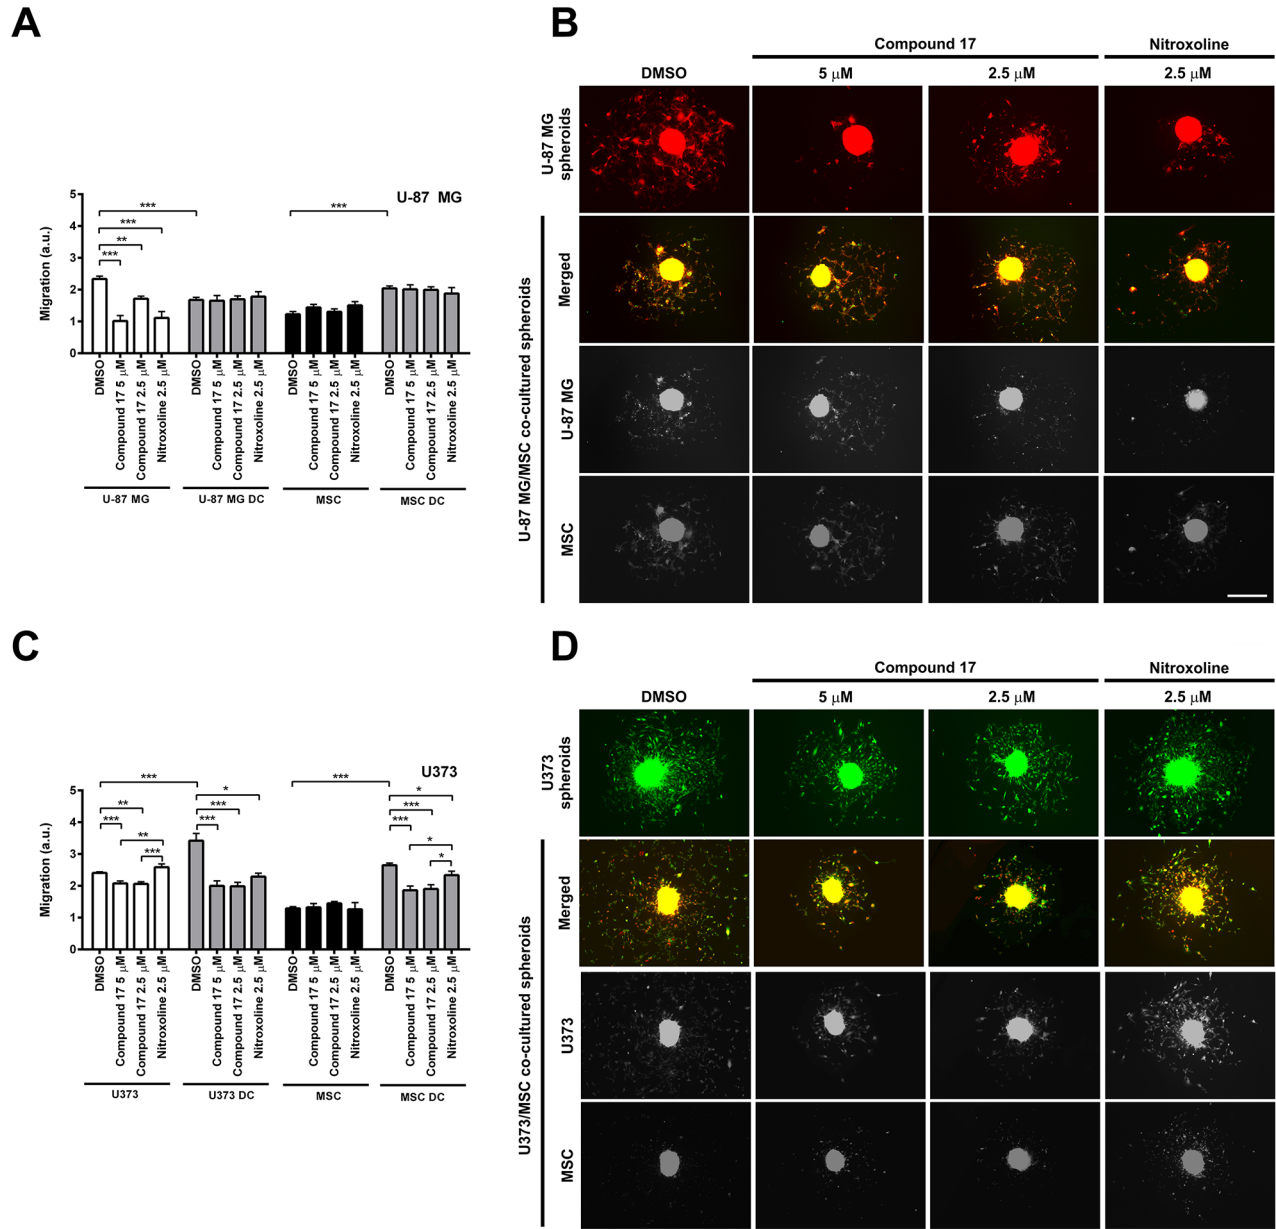

**Figure 4: Effects of compound 17 and nitroxoline on the migration of cells out of co-cultured spheroids.** (A and C) U-87 MG, U373 or MSC spheroids or MSC/glioblastoma direct co-cultured (DC) spheroids were, after generation, placed in the middle of laminin-coated wells of 96-well plates in medium containing compound 17 (2.5  $\mu$ M or 5  $\mu$ M), nitroxoline (2.5  $\mu$ M) or DMSO (0.1%) as a suitable control. Migration of cells was expressed as relative migration and was assessed on day three. Relative migration was calculated as the ratio of migration distance to spheroid diameter, of MSCs and U-87 MG or U373 cells, respectively, out of monoculture and co-cultured spheroids in presence of compound 17 (2.5  $\mu$ M or 5  $\mu$ M), nitroxoline (2.5  $\mu$ M) or control after 72 h on laminin. Experiments were performed in triplicate and are presented as means  $\pm$  SEM. (B and D) Representative images of cell migration out of spheroids, obtained after 72 h on laminin. U-87 MG cells are red; U373 cells are green. MSCs in U-87 MG/MSC spheroids are green and in U373/MSC spheroids are red. Single-channel images from co-cultured spheroids are displayed in grayscale. Scale bar, 500  $\mu$ m. Statistical analysis was performed with one-way ANOVA, followed by the Bonferroni post-hoc test. \* $P < 0.05$ , \*\* $P < 0.01$ , \*\*\* $P < 0.001$ .

to the growth of spheroids and formation of their invading stands in Matrigel, we evaluated the effects of compound 17 and of nitroxoline on the migration of cells out of spheroids, using two human glioblastoma cell lines, U-87 MG and U373. Both compound 17 and nitroxoline significantly decreased migration of cells out of U-87 MG spheroids, while only compound 17 impaired cell migration out of U373 spheroids (Figure 4). In addition

to tumor cells, stromal cells, including mesenchymal stem cells (MSCs), also form a tumor microenvironment and their interactions with tumor cells play a crucial role in tumor progression [41–45]. In the presence of glioblastoma cells, MSCs enhance tumor cell invasion through multiple distant processes, among them peptidase activity regulation [46]. We therefore evaluated the effect of cathepsin B inhibitors, compound 17 and nitroxoline

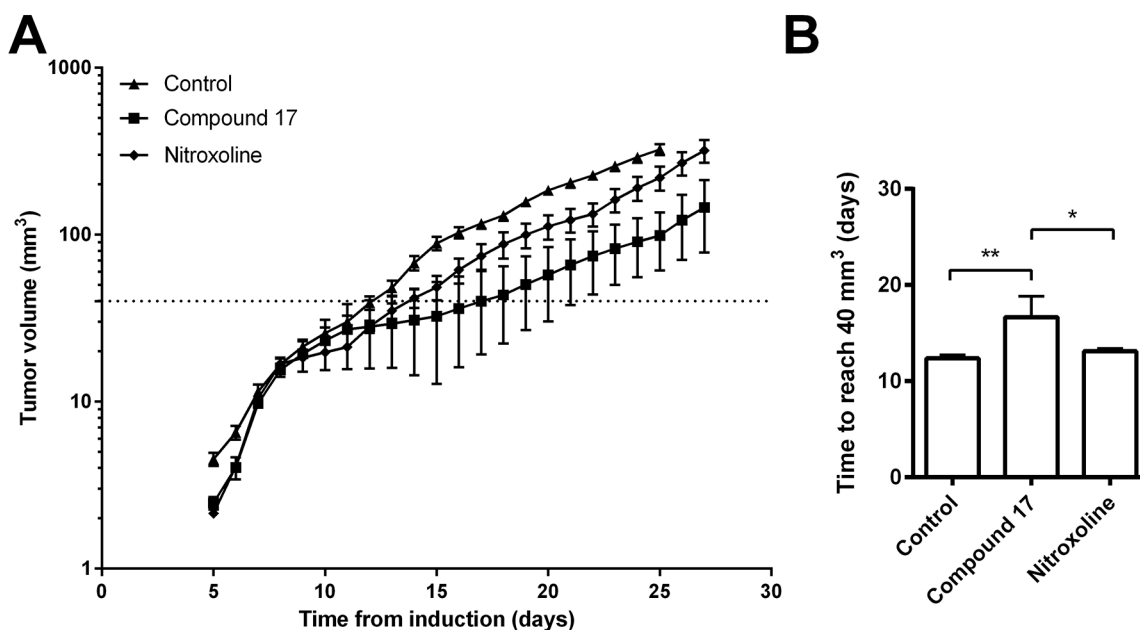

**Figure 5: Compound 17 reduces tumor growth in an LPB mouse tumor model.** (A) LPB cells ( $1.8 \times 10^6$ ) were injected into the right flank of C57Bl/6 mice following treatment with compound 17 or nitroxoline at 20 mg/kg, with drinking water *ad libitum* or, in the case of the control group, with drinking water only for the entire duration of the experiment. The size of LPB-induced tumors was measured every second day. The line indicates a tumor volume of 40 mm<sup>3</sup>. (B) The time required for tumors to reach a volume of 40 mm<sup>3</sup> representing the tumor growth delay between the experimental and control group, was calculated from the growth curves. Data are presented as means  $\pm$  SEM. \* $P < 0.05$ , \*\* $P < 0.01$  as determined with one-way ANOVA.

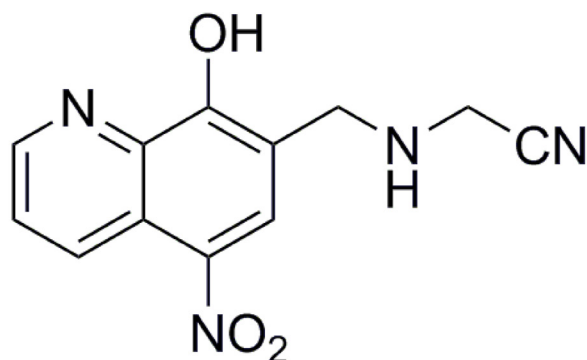

## Compound 17

**Figure 6: Chemical structure of 2-[(8-hydroxy-5-nitroquinoline-7-yl)methyl]amino}acetonitrile (compound 17).**

on the migration of tumor cells out of co-cultured glioblastoma-MSCs spheroids. In U-87 MG/MSC co-cultured spheroids we observed decreased migration of U-87 MG cells out of spheroids and increased MSC migration. However, the addition of either compound 17 or nitroxoline had no effect on the migration of either U-87 MG cells or MSCs out of co-cultured spheroids. On the other hand, when U373/MSC co-cultured spheroids were prepared and studied, the migration of all cells increased and was significantly impaired by compound 17 as well as by nitroxoline. As in U373 monoculture spheroids, compound 17 exhibited a more pronounced inhibition of cell migration than nitroxoline (Figure 4). Our results are in line with the upregulated cathepsin B levels in glioblastoma U373 cells on direct cell-to-cell interactions with MSCs [45, 47]. Besides expression, cathepsin B secretion was also increased in U373/MSC

co-cultured spheroids. Moreover, MSC-mediated invasion of U373 cells decreased after treatment by CA-074Me, a cell permeable analogue of the irreversible cathepsin B inhibitor, CA-074. In contrast, the expression of cathepsin B was not altered in co-cultures of MSCs and other glioblastoma cell line U-87 MG, when compared to U-87 MG monocultures [47].

The anti-cancer properties of compound 17 were further evaluated *in vivo* in an LPB mouse fibrosarcoma tumor model. *Per os* administration of compound 17 reduced the tumor volume and delayed tumor growth (Figure 5). Again, it displayed higher anti-tumor activity than that induced by nitroxoline, since its administration resulted in a significantly greater reduction of tumor volume with prolonged growth delay. Nevertheless, for better assessment of the impact of compound 17 on tumor growth, the concentration of nitroxoline used in this study was just half that used previously [20]. At a higher concentration therefore, it would result in a reduction of tumor growth similar to that in our previous study [20].

Compound 17 is thus shown to be a potent and selective inhibitor of cathepsin B endopeptidase activity and to impair tumor invasion and migration in *in vitro* models, as well as delaying tumor growth in an *in vivo* mouse model. Using focused chemical synthesis, therefore, we have increased the anti-tumor potential of nitroxoline and a novel inhibitor prepared showing more appropriate pharmacological characteristics, making it a promising candidate for further evaluation as an anti-cancer drug.

## MATERIALS AND METHODS

### Compounds

Compound 17 was synthesized as described [33]. Its purity was determined by <sup>1</sup>H NMR and <sup>13</sup>C NMR spectroscopy and by CHN elemental analysis. Nitroxoline was obtained from Sigma-Aldrich (St. Louis, MO, USA).

### Cell culture

The human glioblastoma cell lines U-87 MG and U373 were obtained from American Type Culture Collection (ATCC, Manassas, VA, USA). The cell lines were authenticated by ATCC and thawed from early passage stocks. The LPB-1 fibrosarcoma cell line [48], a clonal derivative of the methylcholanthrene-induced C57Bl/6 mouse sarcoma tumor, was provided by Jean Jr. Belehradec (Institut Gustave Roussy, Villejuif, France). Human bone marrow-derived MSCs were obtained from Lonza Bioscience (Lot. 6F4393, Walkersville, MD, USA). All cell lines were passaged for fewer than 6 months after thawing. No authentication was done by the authors. U-87 MG cells were cultured in Advanced Dulbecco's Modified Eagle's Medium (DMEM; Gibco, Carlsbad, CA, USA)

supplemented with 10% fetal bovine serum (FBS; Gibco), 2 mM glutamine (Sigma-Aldrich) and antibiotics. U373 cells and MSCs were cultured in DMEM supplemented with 10% FBS, 2 mM glutamine, antibiotics, 1 mM Napyruvate (Gibco) and non-essential amino acids (Sigma-Aldrich). LPB-1 cells were cultured in Minimum Essential Medium (MEM; Sigma-Aldrich) supplemented with 10% FBS, 2 mM glutamine and antibiotics. U373 cells stably expressing enhanced green fluorescent protein (U373 eGFP cells) and U87 cells expressing red fluorescent protein (dsRED) were prepared as described [45, 49]. The cells were maintained at 37 °C in a humidified atmosphere containing 5% CO<sub>2</sub> until 80% confluent. Prior to their use in the assay, cells were detached from the culture flask using 0.05% trypsin (Gibco) and 0.02% EDTA in phosphate buffered saline (PBS), pH = 7.4.

### Cell viability assay

The possible cytotoxic effects of compound 17 and nitroxoline in the cell lines used were determined by MTS [3-(4,5-dimethylthiazol-2-yl)-5-(3-carboxymethoxyphenyl)-2-(4-sulfophenyl)-2H-tetrazolium] colorimetric assay. U-87 MG ( $3 \times 10^4$  and  $5 \times 10^3$  for 24 and 72 hours respectively), LPB-1 ( $1 \times 10^5$  and  $2.5 \times 10^3$  for 24 and 72 h, respectively), U373 ( $3 \times 10^4$  cells for 72 h) cells and MSCs ( $3 \times 10^4$  for 72 h) were seeded into wells of a 96-well microplate and allowed to attach overnight. They were then treated with 100  $\mu$ l of medium containing 1.25, 2.5 or 5  $\mu$ M of inhibitor or DMSO (0.05%) and incubated for 24 or 72 h. 10  $\mu$ l of MTS (Promega, Madison, WI, USA) was then added to the walls of a 96-well microplate and, after incubation, absorbance of formazan was measured at 490 nm on a Tecan Safire<sup>2</sup>™ (Tecan, Mannedorf, Switzerland). Cell viability (%) was expressed as the ratio of absorbance obtained in the presence of compounds to that in DMSO alone. All assays were performed in quadruplicate and repeated twice.

### Real-time invasion assay

Tumor cell invasion in real time of U-87 MG and LPB-1 cells was monitored using an xCELLigence RTCA instrument (ACEA Biosciences Inc., San Diego, CA, USA). Before the experiment, the cells were starved of serum for 24 h. First, the bottoms of the wells of a CIM-plate 16 (ACEA Biosciences Inc.) were coated for 30 min with 0.3  $\mu$ g of fibronectin from bovine plasma (Calbiochem, Darmstadt, Germany). Following coating of the upper compartments of a CIM-plate 16 with 20  $\mu$ l of Matrigel (2 mg/ml and 1 mg/ml for U-87 MG and LPB-1 cells (BD Biosciences, Franklin Lakes, NJ, USA)) in serum-free medium (SFM). Matrigel was allowed to gel for 20 min at 37 °C. 180  $\mu$ l of medium containing respective compound (2.5 or 5  $\mu$ M) or DMSO (0.05 %) as control



was added to the lower compartments and the top and the bottom parts of the CIM-plate 16 were assembled together. Next, 60  $\mu\text{L}$  of SFM, together with the compounds to be tested, were added to the upper compartments. After 1 h incubation at 37°C, 80  $\mu\text{L}$  of U-87 MG or LPB-1 cells ( $7.5 \times 10^4$  or  $5 \times 10^4$  cells/well for U-87 MG or LPB-1 cells) were seeded in the top chambers of a CIM-plate 16 and placed into the xCELLigence system. The system measures impedance data, reported as cell index (CI), in real time every 15 min during the 72 h course of the experiment. The data were analyzed with the RTCA Software (Roche). The relative invasion (%) was expressed as a percentage of that of control cells treated with DMSO.

### Three-dimensional invasion assay

The 3D invasion model is based on implantation of tumor spheroids into Matrigel, representing a model of the ECM (tumor microenvironment). Spheroids were prepared according to the hanging-drop method [35]. Drops (20  $\mu\text{L}$ ) of U-87 MG cell suspension (150 cells/drop) were placed on the lids of 100 mm tissue-culture dishes which were then inverted over 10 ml of water. After 5 days, the aggregates formed were transferred to wells of a Lab-Tek™ Chambered Coverglass coated with 70  $\mu\text{L}$  of Matrigel (5 mg/ml) in SFM. Next, a further 70  $\mu\text{L}$  of Matrigel was added to cover the spheroids and, after 20 min incubation at 37°C, 400  $\mu\text{L}$  of complete medium was added. Compounds (2.5 or 5  $\mu\text{M}$ ) or DMSO (0.05 %) were added to the Matrigel and the medium. The growth of spheroids was monitored daily for up to three days by measuring the spheroid dimensions under a light microscope, using an ocular micrometer. Spheroid volume was calculated according to the equation:  $V = (\pi \times (\text{spheroid length}) \times (\text{spheroid width})^2)/6$ . Images of tumor spheroids were obtained using an Olympus IX 81 motorized inverted microscope and Cell^R software (Olympus, Tokyo, Japan).

### Migration assay

Cell migration was monitored using fluorescent glioblastoma cells U-87 MG dsRED and U373 eGFP, and MSCs. For separate monitoring of MSCs and glioblastoma cell migration in co-cultured MSC/U-87 MG and MSC/U373 cell spheroids, MSCs were labelled, prior to spheroid formation, with the non-toxic fluorescent dyes Vybrant DiO and Vybrant DiI (Molecular Probes, Eugene, OR, USA) according to the manufacturer's instructions. For co-cultured spheroid formation fluorescent glioblastoma cells and Vybrant-labelled MSCs were mixed together in a 1:1 ratio and seeded, at a density of  $2.5 \times 10^3$  cells/100  $\mu\text{L}$  in complete growth medium containing 4% methylcellulose, into BD Falcon U-bottom 96-well cell culture plates (BD Biosciences, Franklin Lakes, NJ, USA). They were then centrifuged at 850 x g and 31°C

for 90 min and then incubated overnight. For the migration assay, 96-well plates (Corning, Corning, NY, USA) were coated with laminin (2  $\mu\text{g}/\text{cm}^2$ , Sigma-Aldrich) for 2 h at 37°C and washed twice with PBS. U-87 MG, U373 and MSC spheroids from monoculture and co-cultured spheroids were then placed in the middle of each well in 100  $\mu\text{L}$  of growth medium. Compounds (2.5 or 5  $\mu\text{M}$ ) or DMSO (0.1%) were added to the culture medium. The cell migration was monitored for up to 3 days under a Nikon Eclipse Ti-E fluorescence inverted microscope (40 $\times$  magnification, Nikon, Tokyo, Japan). The migration ability of the cells (relative migration) was assessed on day 3 and defined as the distance measured from the edge of the spheroid to the most distant cell population divided by the spheroid diameter.

### Mouse tumor models

#### Ethics statement

Animal studies were carried out in accordance with EU guidelines and with permission from the Veterinary Administration of the Ministry of Agriculture, Forestry and Food of the Republic of Slovenia (permission number: U34401-14/2014/4). Mice were housed in a specific-pathogen-free animal colony at controlled temperature and humidity with a 12 h light/dark cycle. Food and water were provided *ad libitum*.

#### LPB mouse fibrosarcoma tumor model

The effect of compounds on tumor growth *in vivo* was observed in C57Bl/6 female mice, 8 to 12 weeks old.  $1.8 \times 10^6$  LPB fibrosarcoma cells, in 100  $\mu\text{L}$  of 0.9% NaCl, were injected subcutaneously into the right flank of each mouse. In the experimental group, mice were given a solution of compound 17 ( $n = 7$ , 20 mg/kg) or nitroxoline ( $n = 12$ , 20 mg/kg – half the dose used in the previous study [20]) in their drinking water *ad libitum* for the entire duration of the study (27 days). The bottle with fresh solution of the compounds was provided every fourth day. The control group ( $n = 11$ ) received drinking water only. The dose of inhibitor received was calculated from the volume of the consumed solution per mouse provided prior the beginning of the study ( $2.8 \pm 0.1$  ml). Tumor growth was determined every 2 to 3 days from the fifth day after the induction of tumors, using a digital Vernier caliper. The tumors were measured in three perpendicular directions (a, b, c) and tumor volume was calculated as  $V = a \times b \times c \times \pi/6$ . The tumor growth curves were used to determine the time required to reach a volume of 40  $\text{mm}^3$ . Tumor growth delay was determined as the difference between the time required for tumors to reach a volume of 40  $\text{mm}^3$  in the experimental and in the control groups. The weight, behavior and appearance of the mice, using a scoring system, were followed as a general indicator of systemic toxicity.

## Statistical analysis

The GraphPad Prism 6.0 software package was used for data analysis. Data are presented as means  $\pm$  SEM unless stated otherwise. The statistical significance of the differences between groups of data was evaluated using nonparametric, two-tailed Student's t test, unless stated otherwise. Differences were considered significant at  $P \leq 0.05$ .

## Abbreviations

CI: cell index; DMSO: dimethyl sulfoxide; ECM: extracellular matrix; MSC: mesenchymal stem cell; MTS: [3-(4,5-dimethylthiazol-2-yl)-5-(3-carboxymethoxyphenyl)-2-(4-sulfophenyl)-2H-tetrazolium]; 2D: two-dimensional; 3D: three-dimensional.

## Author contributions

A.M., Š.K., U.L.T., B.B., S.K., B.M., T.L., M.Č., G.S. and J.K. conceived and designed the experiments. A.M., Š.K., U.L.T., B.B. and S.K. performed the experiments and analyzed the data. I.S. and S.G. synthesized the inhibitor. A.M. and J.K. prepared the manuscript. All authors reviewed the manuscript.

## ACKNOWLEDGMENTS

The authors thank Prof. Roger Pain for critical reading of the manuscript.

## CONFLICTS OF INTEREST

The authors declare no potential conflicts of interest.

## FINANCIAL SUPPORT

This work was supported by the Slovenian Research Agency (grant numbers J4-5529 and P4-0127 to J.K. and Z1-7181 to I.S.).

## REFERENCES

1. Mohamed MM, Sloane BF. Cysteine cathepsins: multifunctional enzymes in cancer. *Nat Rev Cancer*. 2006; 6: 764–75. <https://doi.org/10.1038/nrc1949>.
2. Kos J, Mitrović A, Mirković B. The current stage of cathepsin B inhibitors as potential anticancer agents. *Future Med Chem*. 2014; 6: 1355–71. <https://doi.org/10.4155/fmc.14.73>.
3. Vasiljeva O, Reinheckel T, Peters C, Turk D, Turk V, Turk B. Emerging roles of cysteine cathepsins in disease and their potential as drug targets. *Curr Pharm Des*. 2007; 13: 387–403.
4. Joyce JA, Hanahan D. Multiple roles for cysteine cathepsins in cancer. *Cell Cycle*. 2004; 3: 1516–9. <https://doi.org/10.4161/cc.3.12.1289>.
5. Skrzydlewska E, Sulkowska M, Koda M, Sulkowski S. Proteolytic-antiproteolytic balance and its regulation in carcinogenesis. *World J Gastroenterol*. 2005; 11: 1251–66.
6. Roshly S, Sloane BF, Moin K. Pericellular cathepsin B and malignant progression. *Cancer Metastasis Rev*. 2003; 22: 271–86.
7. Buck MR, Karustis DG, Day NA, Honn KV, Sloane BF. Degradation of extracellular-matrix proteins by human cathepsin B from normal and tumour tissues. *Biochem J*. 1992; 282: 273–8.
8. Premzl A, Zavašnik-Bergant V, Turk V, Kos J. Intracellular and extracellular cathepsin B facilitate invasion of MCF-10A neoT cells through reconstituted extracellular matrix *in vitro*. *Exp Cell Res*. 2003; 283: 206–14. [https://doi.org/10.1016/S0014-4827\(02\)00055-1](https://doi.org/10.1016/S0014-4827(02)00055-1).
9. Mirković B, Premzl A, Hodnik V, Doljak B, Jevnikar Z, Anderluh G, Kos J. Regulation of cathepsin B activity by 2A2 monoclonal antibody. *FEBS J*. 2009; 276: 4739–51. <https://doi.org/10.1111/j.1742-4658.2009.07171>.
10. Kostoulas G, Lang A, Nagase H, Baici A. Stimulation of angiogenesis through cathepsin B inactivation of the tissue inhibitors of matrix metalloproteinases. *FEBS Lett*. 1999; 455: 286–90. [https://doi.org/10.1016/S0014-5793\(99\)00897-2](https://doi.org/10.1016/S0014-5793(99)00897-2).
11. Premzl A, Turk V, Kos J. Intracellular proteolytic activity of cathepsin B is associated with capillary-like tube formation by endothelial cells *in vitro*. *J Cell Biochem*. 2006; 97: 1230–40. <https://doi.org/10.1002/jcb.20720>.
12. Cavallo-Medved D, Rudy D, Blum G, Bogyo M, Caglic D, Sloane BF. Live-cell imaging demonstrates extracellular matrix degradation in association with active cathepsin B in caveolae of endothelial cells during tube formation. *Exp Cell Res*. 2009; 315: 1234–46. <https://doi.org/10.1016/j.yexcr.2009.01.021>.
13. Barrett AJ, Kirschke H. Cathepsin B, cathepsin H, and cathepsin L. *Methods Enzymol*. 1981; 80: 535–61. [https://doi.org/10.1016/S0076-6879\(81\)80043-2](https://doi.org/10.1016/S0076-6879(81)80043-2).
14. Illy C, Quraishi O, Wang J, Purisima E, Vernet T, Mort JS. Role of the occluding loop in cathepsin B activity. *J Biol Chem*. 1997; 272: 1197–202. <https://doi.org/10.1074/jbc.272.2.1197>.
15. Musil D, Zucic D, Turk D, Engh RA, Mayr I, Huber R, Popovic T, Turk V, Towatari T, Katunuma N. The refined 2.15 Å X-ray crystal structure of human liver cathepsin B: the structural basis for its specificity. *EMBO J*. 1991; 10: 2321–30.
16. Nägler DK, Storer AC, Portaro FC, Carmona E, Juliano L, Ménard R. Major increase in endopeptidase activity of human cathepsin B upon removal of occluding loop contacts. *Biochemistry*. 1997; 36: 12608–15. <https://doi.org/10.1021/bi971264+>.
17. Krupa JC, Hasnain S, Nägler DK, Ménard R, Mort JS. S2' substrate specificity and the role of His110 and His111 in the exopeptidase activity of human cathepsin B. *Biochem J*. 2002; 361: 613–9. <https://doi.org/10.1042/0264-6021:3610613>.

18. Almeida PC, Nantes IL, Chagas JR, Rizzi CC, Faljoni-Alario A, Carmona E, Juliano L, Nader HB, Tersariol IL. Cathepsin B activity regulation. Heparin-like glycosaminoglycans protect human cathepsin B from alkaline pH-induced inactivation. *J Biol Chem.* 2001; 276: 944–51. <https://doi.org/10.1074/jbc.M003820200>.
19. Mitrović A, Mirković B, Sosić I, Gobec S, Kos J. Inhibition of endopeptidase and exopeptidase activity of cathepsin B impairs extracellular matrix degradation and tumour invasion. *Biol Chem.* 2016; 397: 165–74. <https://doi.org/10.1515/hsz-2015-0236>.
20. Mirković B, Markelc B, Butinar M, Mitrović A, Sosić I, Gobec S, Vasiljeva O, Turk B, Čemažar M, Serša G, Kos J. Nitroxoline impairs tumor progression *in vitro* and *in vivo* by regulating cathepsin B activity. *Oncotarget.* 2015; 6: 19027–42. doi: 10.18632/oncotarget.3699.
21. Schmitz J, Beckmann AM, Dudic A, Li T, Sellier R, Bartz U, Gütschow M. 3-Cyano-3-aza-β-amino acid derivatives as inhibitors of human cysteine cathepsins. *ACS Med Chem Lett.* 2014; 5: 1076–81. <https://doi.org/10.1021/ml500238q>.
22. Schmitz J, Li T, Bartz U, Gütschow M. Cathepsin B inhibitors: combining dipeptide nitriles with an occluding loop recognition element by click chemistry. *ACS Med Chem Lett.* 2016; 7: 211–6. <https://doi.org/10.1021/acsmchemlett.5b00474>.
23. Pan X, Tan N, Zeng G, Zhang Y, Jia R. Amentoflavone and its derivatives as novel natural inhibitors of human Cathepsin B. *Bioorg Med Chem.* 2005; 13: 5819–25. <https://doi.org/10.1016/j.bmc.2005.05.071>.
24. Zeng GZ, Pan XL, Tan NH, Xiong J, Zhang YM. Natural biflavones as novel inhibitors of cathepsin B and K. *Eur J Med Chem.* 2006; 41: 1247–52. <https://doi.org/10.1016/j.ejmech.2006.06.002>.
25. Schenker P, Alfarano P, Kolb P, Caffisch A, Baici A. A double-headed cathepsin B inhibitor devoid of warhead. *Protein Sci.* 2008; 17: 2145–55. <https://doi.org/10.1110/ps.037341.108>.
26. Sosić I, Mirković B, Turk S, Štefane B, Kos J, Gobec S. Discovery and kinetic evaluation of 6-substituted 4-benzylthio-1,3,5-triazin-2(1H)-ones as inhibitors of cathepsin B. *Eur J Med Chem.* 2011; 46: 4648–56. <https://doi.org/10.1016/j.ejmech.2011.08.005>.
27. Mirković B, Renko M, Turk S, Sosić I, Jevnikar Z, Obermajer N, Turk D, Gobec S, Kos J. Novel mechanism of cathepsin B inhibition by antibiotic nitroxoline and related compounds. *ChemMedChem.* 2011; 6: 1351–6. <https://doi.org/10.1002/cmde.201100098>.
28. Shim JS, Matsui Y, Bhat S, Nacev BA, Xu J, Bhang HE, Dhara S, Han KC, Chong CR, Pomper MG, So A, Liu JO. Effect of nitroxoline on angiogenesis and growth of human bladder cancer. *J Natl Cancer Inst.* 2010; 102: 1855–73. <https://doi.org/10.1093/jnci/djq457>.
29. Lazovic J, Guo L, Nakashima J, Mirsadraei L, Yong W, Kim HJ, Ellingson B, Wu H, Pope WB. Nitroxoline induces apoptosis and slows glioma growth *in vivo*. *Neuro Oncol.* 2015; 17: 53–62. <https://doi.org/10.1093/neuonc/nou139>.
30. Zhang QI, Wang S, Yang D, Pan K, Li L, Yuan S. Preclinical pharmacodynamic evaluation of antibiotic nitroxoline for anticancer drug repurposing. *Oncol Lett.* 2016; 11: 3265–72. <https://doi.org/10.3892/ol.2016.4380>.
31. Chang WL, Hsu LC, Leu WJ, Chen CS, Guh JH. Repurposing of nitroxoline as a potential anticancer agent against human prostate cancer: a crucial role on AMPK/mTOR signaling pathway and the interplay with Chk2 activation. *Oncotarget.* 2015; 6: 39806–20. <https://doi.org/10.18632/oncotarget.5655>.
32. Mao H, Du Y, Zhang Z, Cao B, Zhao J, Zhou H, Mao X. Nitroxoline shows antimyeloma activity by targeting the TRIM25/p53 axle. *Anticancer Drugs.* 2017; 28: 376–83. <https://doi.org/10.1097/CAD.0000000000000466>.
33. Sosić I, Mirković B, Arenz K, Štefane B, Kos J, Gobec S. Development of new cathepsin B inhibitors: combining bioisosteric replacements and structure-based design to explore the structure-activity relationships of nitroxoline derivatives. *J Med Chem.* 2013; 56: 521–33. <https://doi.org/10.1021/jm301544x>.
34. Eisenberg MC, Kim Y, Li R, Ackerman WE, Kniss DA, Friedman A. Mechanistic modeling of the effects of myoferlin on tumor cell invasion. *Proc Natl Acad Sci U S A.* 2011; 108: 20078–83. <https://doi.org/10.1073/pnas.1116327108>.
35. Kelm JM, Timmins NE, Brown CJ, Fussenegger M, Nielsen LK. Method for generation of homogeneous multicellular tumor spheroids applicable to a wide variety of cell types. *Biotechnol Bioeng.* 2003; 83: 173–80. <https://doi.org/10.1002/bit.10655>.
36. Frizler M, Lohr F, Lülldorff M, Gütschow M. Facing the gem-dialkyl effect in enzyme inhibitor design: preparation of homocycloleucine-based azadipeptide nitriles. *Chemistry.* 2011; 17: 11419–23. <https://doi.org/10.1002/chem.201101350>.
37. Kos J, Lah TT. Cysteine proteinases and their endogenous inhibitors: target proteins for prognosis, diagnosis and therapy in cancer (review). *Oncol Rep.* 1998; 5: 1349–61.
38. Aggarwal N, Sloane BF. Cathepsin B: multiple roles in cancer. *Proteomics Clin Appl.* 2014; 8: 427–37. <https://doi.org/10.1002/prca.201300105>.
39. Gole B, Huszthy PC, Popović M, Jeruc J, Ardebili YS, Bjerkvig R, Lah TT. The regulation of cysteine cathepsins and cystatins in human gliomas. *Int J Cancer.* 2012; 131: 1779–89. <https://doi.org/10.1002/ijc.27453>.
40. Pišlar A, Perišić Nanut M, Kos J. Lysosomal cysteine peptidases – molecules signaling tumor cell death and survival. *Semin Cancer Biol.* 2015; 35: 168–79. <https://doi.org/10.1016/j.semcancer.2015.08.001>.
41. Hanahan D, Weinberg RA. Hallmarks of cancer: the next generation. *Cell.* 2011; 144: 646–74. <https://doi.org/10.1016/j.cell.2011.02.013>.

42. Motaln H, Turnsek TL. Cytokines play a key role in communication between mesenchymal stem cells and brain cancer cells. *Protein Pept Lett*. 2015; 22: 322–31.
43. Sloane BF, Yan S, Podgorski I, Linebaugh BE, Cher ML, Mai J, Cavallo-Medved D, Sameni M, Dosesu J, Moin K. Cathepsin B and tumor proteolysis: contribution of the tumor microenvironment. *Semin Cancer Biol*. 2005; 15: 149–57. <https://doi.org/10.1016/j.semcancer.2004.08.001>.
44. Joyce JA, Pollard JW. Microenvironmental regulation of metastasis. *Nat Rev Cancer*. 2009; 9: 239–52. <https://doi.org/10.1038/nrc2618>.
45. Schichor C, Albrecht V, Korte B, Buchner A, Riesenberger R, Mysliwicz J, Paron I, Motaln H, Turnšek TL, Jürchott K, Selbig J, Tonn JC. Mesenchymal stem cells and glioma cells form a structural as well as a functional syncytium *in vitro*. *Exp Neurol*. 2012; 234: 208–19. <https://doi.org/10.1016/j.expneurol.2011.12.033>.
46. Swamydas M, Ricci K, Rego SL, Dréau D. Mesenchymal stem cell-derived CCL-9 and CCL-5 promote mammary tumor cell invasion and the activation of matrix metalloproteinases. *Cell Adh Migr*. 2013; 7: 315–24. <https://doi.org/10.4161/cam.25138>.
47. Breznik B, Motaln H, Vittori M, Rotter A, Lah Turnšek T. Mesenchymal stem cells differentially affect the invasion of distinct glioblastoma cell lines. *Oncotarget*. 2017; 8: 25482–99. <https://doi.org/10.18632/oncotarget.16041>.
48. Belehradek J, Barski G, Thonier M. Evolution of cell-mediated antitumor immunity in mice bearing a syngeneic chemically induced tumor. Influence of tumor growth, surgical removal and treatment with irradiated tumor cells. *Int J Cancer*. 1972; 9: 461–9.
49. Pillat MM, Oliveira MN, Motaln H, Breznik B, Glaser T, Lah TT, Ulrich H. Glioblastoma-mesenchymal stem cell communication modulates expression patterns of kinin receptors: possible involvement of bradykinin in information flow. *Cytometry A*. 2016; 89: 365–75. <https://doi.org/10.1002/cyto.a.22800>.
